# Supplementary material for: Scalable preparation of monodisperse micron-sized carbon microspheres and their application in anion-exchange chromatography
Source: Royal Society of Chemistry journal article supplement (doi:10.1039/c6ra16939b), 2016-01-01
Supplement: c6ra16939b1.pdf [file c6ra16939b1.pdf]

**Scalable preparation of monodisperse micron-sized carbon  
microspheres and their application in anion-exchange  
chromatography**

Qiming Zhao, Shuchao Wu, Peimin Zhang, Yan Zhu\*.

\*Corresponding author Tel.: +86-571-88273637; Fax: +86-571-88273637

E-mail address: [zhuyan@zju.edu.cn](mailto:zhuyan@zju.edu.cn)

**Content**

|                                                        |        |
|--------------------------------------------------------|--------|
| Table S1 The element analysis of CMSs and Q-CMSs-----  | Page 2 |
| Fig. S1 The FTIR spectrum of CMSs and Q-CMSs-----      | Page 2 |
| Fig. S2 The N-1s XPS characterization of Q-CMSs-----   | Page 3 |
| Fig. S3 The TGA investigations of CMSs and Q-CMSs----- | Page 4 |

Table. S1 The element analysis of CMSs and Q-CMSs

| Samples | C (wt%) | H (wt%) | N (wt%) | O (wt%) |
|---------|---------|---------|---------|---------|
| CMSs    | 68.10   | 4.92    | None    | 26.98   |
| Q-CMSs  | 59.61   | 7.52    | 0.99    | 31.88   |

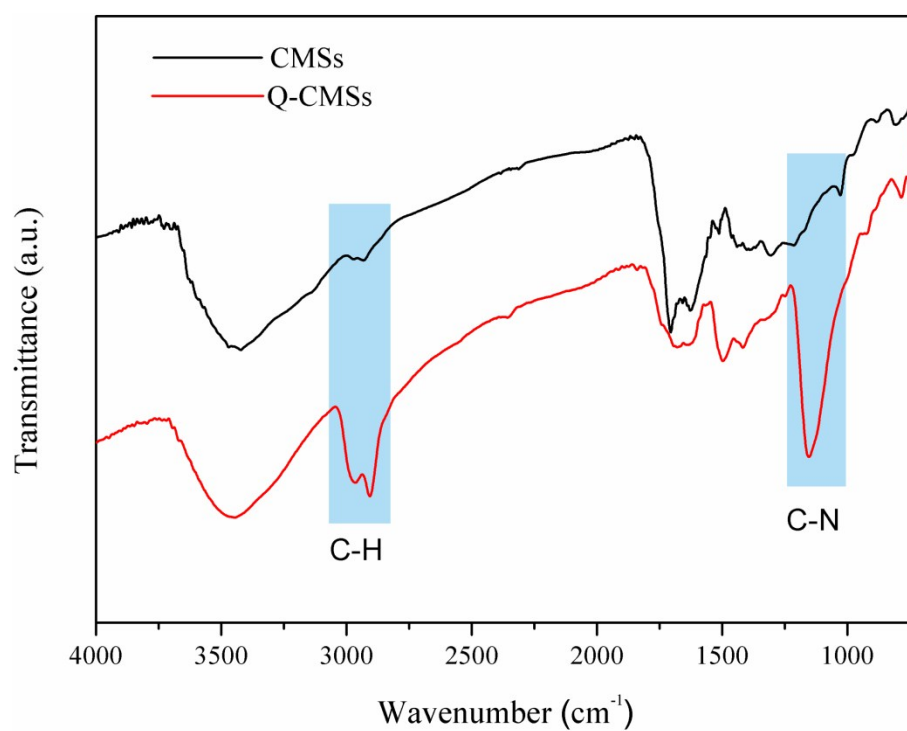

Fig. S1 The FTIR spectrum of CMSs and Q-CMSs

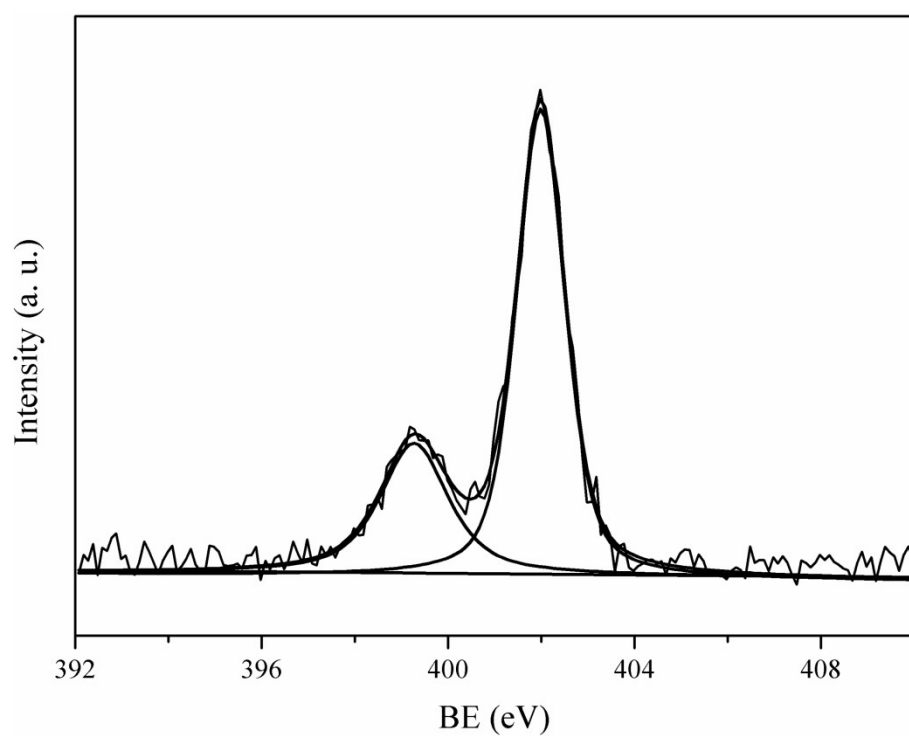

Fig. S2 The N-1s XPS characterization of Q-CMSs

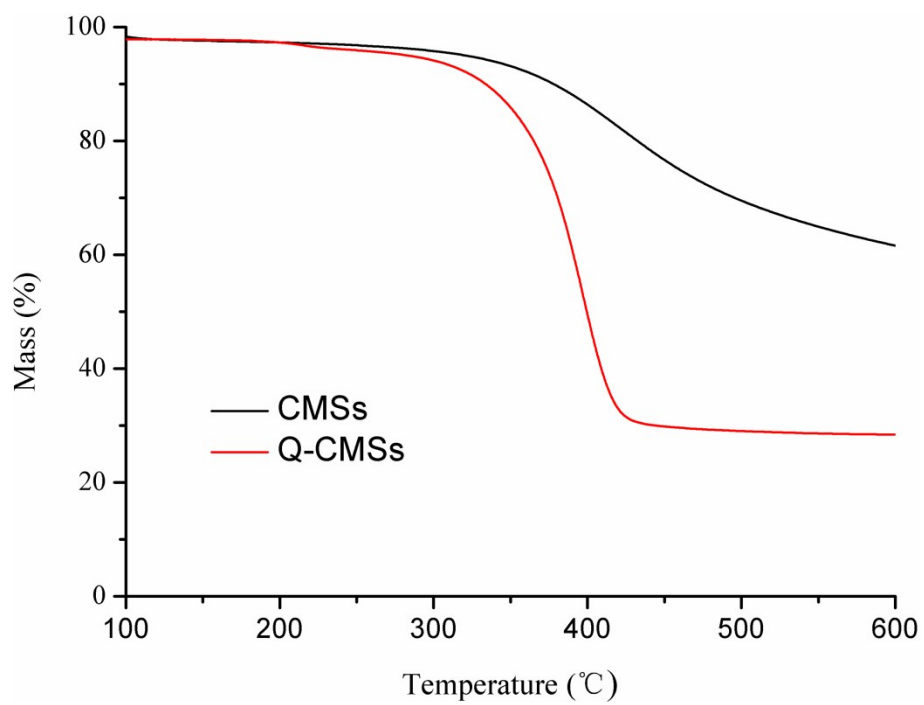

Fig. S3 The TGA investigations of CMSs and Q-CMSs
